# Supplementary material for: Different hollow and spherical TiO2 morphologies have distinct activities for the photocatalytic inactivation of chemical and biological agents
Source: Royal Society of Chemistry journal article supplement (doi:10.1039/c6pp00093b), 2016-07-06
Supplement: c6pp00093b1.pdf [file c6pp00093b1.pdf]

## Supplementary Information

### **Different hollow and spherical TiO<sub>2</sub> morphologies have distinct activities for the photocatalytic inactivation of chemical and biological agents**

Yuichi Yamaguchi,<sup>a,b</sup> Takahito Shimodo,<sup>a,c</sup> Sho Usuki,<sup>a,c</sup> Kanjiro Torigoe,<sup>d</sup> Chiaki Terashima,<sup>a</sup> Ken-ichi Katsumata,<sup>a</sup> Masahiko Ikekita,<sup>a,c</sup> Akira Fujishima,<sup>a</sup> Hideki Sakai,<sup>a,b</sup> and Kazuya Nakata<sup>\*a,c</sup>

<sup>a</sup>*Research Institute for Science and Technology, Photocatalysis International Research Center, Tokyo University of Science, 2641 Yamazaki, Noda, Chiba 278-8510, Japan*

<sup>b</sup>*Department of Pure and Applied Chemistry, Faculty of Science and Technology, Tokyo University of Science, 2641 Yamazaki, Noda, Chiba 278-8510, Japan*

<sup>c</sup>*Department of Applied Biological Science, Faculty of Science and Technology, Tokyo University of Science, 2641 Yamazaki, Noda, Chiba 278-8510, Japan*

<sup>d</sup>*Research Institute for Science and Technology, Tokyo University of Science, 2641 Yamazaki, Noda, Chiba 278-0022, Japan*

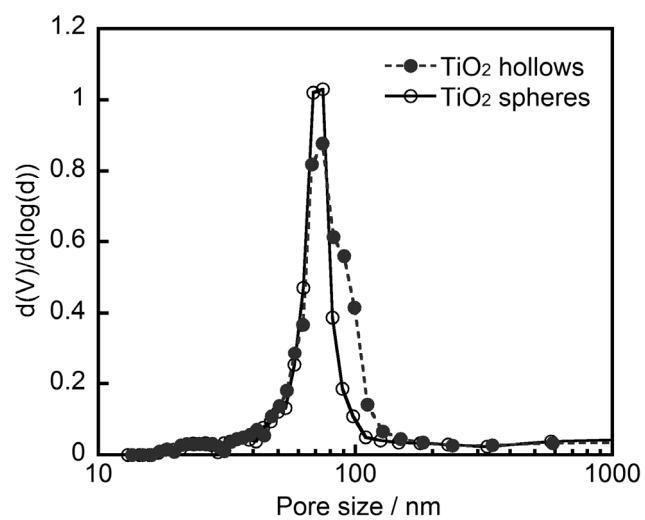

**Figure S1.** Pore size distributions of TiO<sub>2</sub> hollows and spheres.

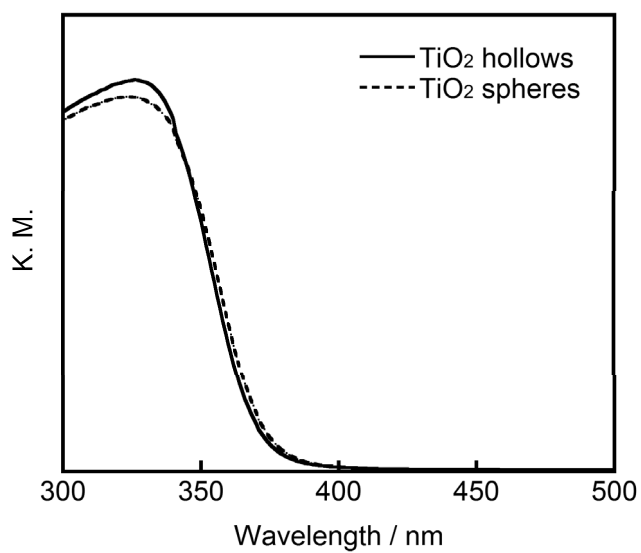

**Figure S2.** Diffuse reflectance spectra of TiO<sub>2</sub> hollows and spheres.

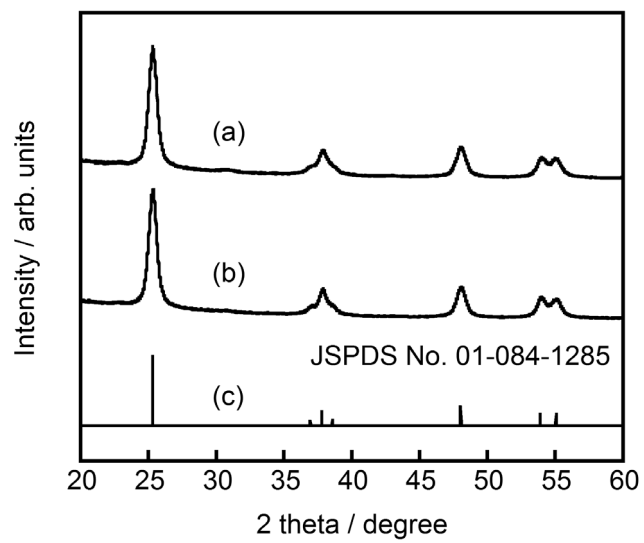

**Figure S3.** X-ray diffraction patterns of a) TiO<sub>2</sub> spheres and b) hollows after calcination at 773 K.
